# Supplementary material for: SnRK1 phosphorylation of FUSCA3 positively regulates embryogenesis, seed yield, and plant growth at high temperature in Arabidopsis
Source: PubMed Central journal article supplement (PMC5853833; doi:10.1093/jxb/erx233), 2017-07-22
Supplement: erx233_suppl_supplementary_table_s1_figures_s1_s4.pdf [file erx233_suppl_supplementary_table_s1_figures_s1_s4.pdf]

**Table S1.** List of primers used in this study.

| <b>Gene ID</b>             | <b>Forward Primer<br/>Reverse Primer</b>       |
|----------------------------|------------------------------------------------|
| <b>CRU2</b><br>At1G03880   | TCGAACCATCCCAAATCATC<br>TTAGACCCCTTCCGTGAACA   |
| <b>SCT</b><br>At1G47540    | TCGTTTTGGCTATCTTTGCAG<br>CAACGGCATACTCCACCTTT  |
| <b>2S3</b><br>At4G27160    | CGATGAGTTCGATTTGAGG<br>GGTGGTCTGGAAGGGACATT    |
| <b>KCS18</b><br>AT4G34520  | ACAAGGCATTTATGCTGGAGA<br>CGCTCTCATCGTCTTCTTGTT |
| <b>GA3ox2</b><br>AT1G80340 | CCACCACCTCAAATACTGTGAA<br>GGCTCTGTCTGGTTCTGGAC |
| <b>ACT7</b><br>AT5G09810   | TCACAGAGGCACCTCTTAACC<br>CCCTCGTAGATTGGCACAG   |
| <b>FUS3-eGFP</b>           | TTGGGCTCCGTTGAGAATATC<br>GCAGATGAACTTCAGGGTCAG |

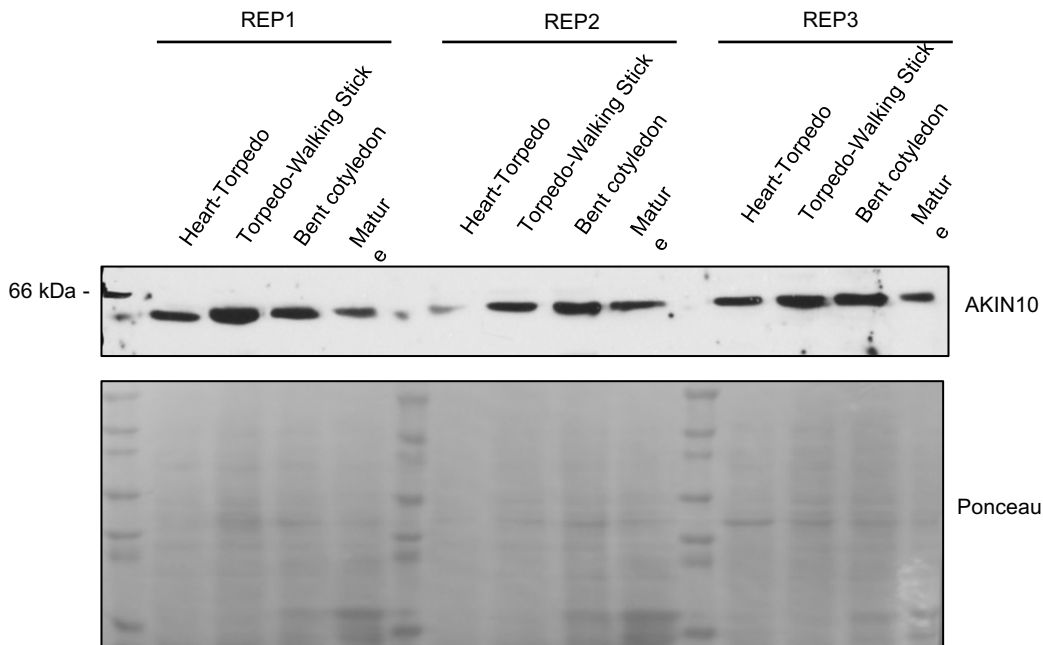

### Supplemental Fig S1. AKIN10 protein levels during seed development

AKIN10 protein was detected throughout seed development from total soluble protein of isolated seeds using anti-AKIN10. Three biological replicates (REP) are shown. Ponceau stain is shown as the loading control.

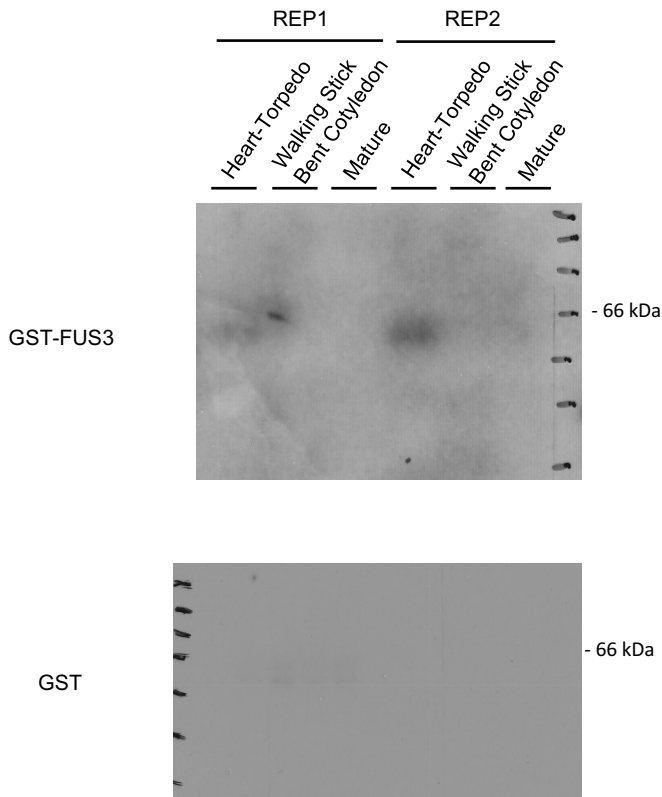

### Supplemental Fig S2. In-gel kinase assays.

In-gel kinase assay using GST-FUS3 (top) or GST (bottom) as the substrates. Cell extracts from siliques corresponding to the the heart/torpedo stage embryos show a phosphorylation band at the expected size of AKIN10 (~60 kDa). Two biological replicates (REP) were conducted.

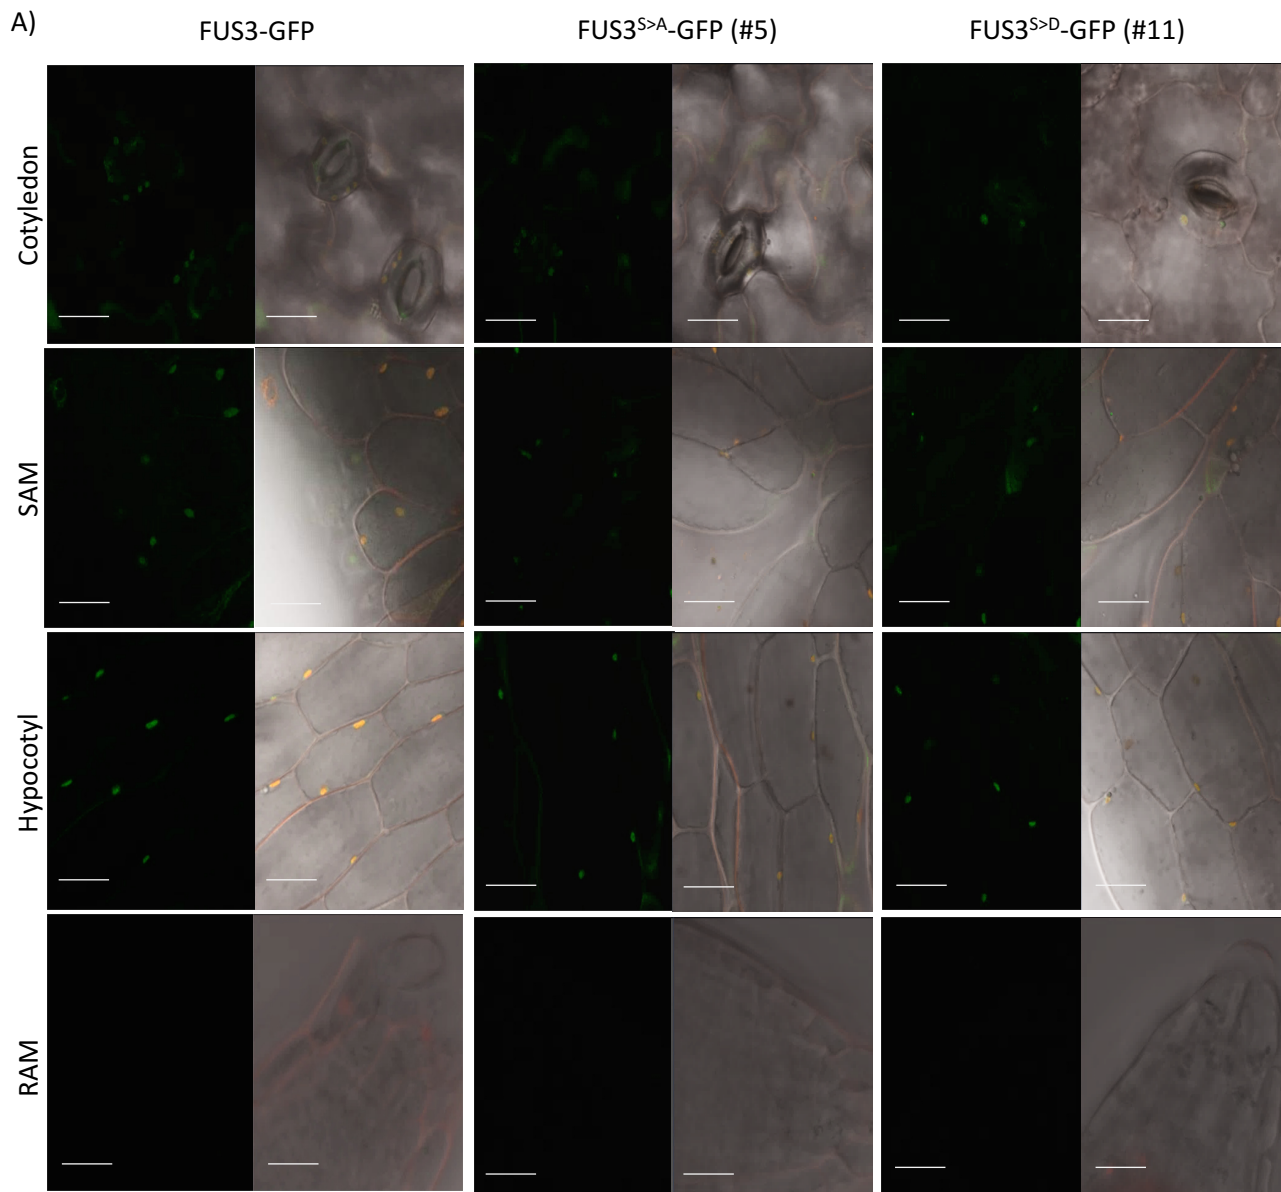

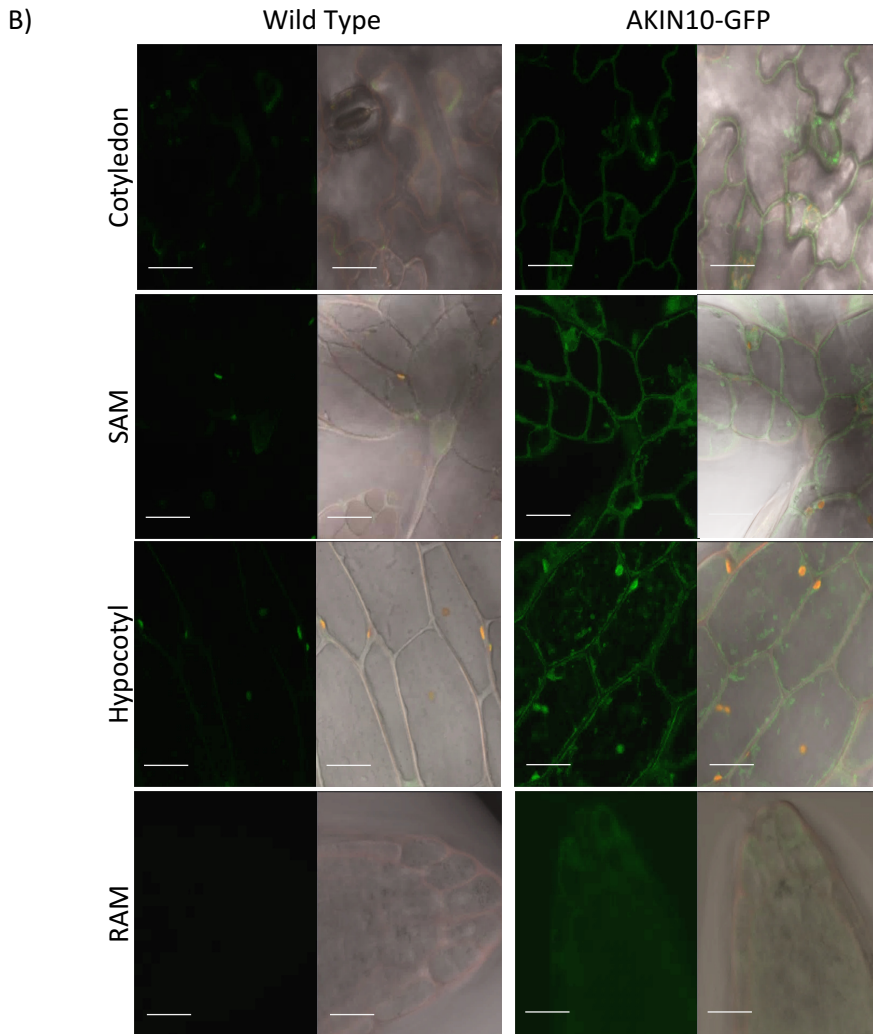

**Supplemental Fig. S3.** FUS3-GFP and its phospho-variants are undetectable during early vegetative development at control temperature.

A) Confocal images showing lack of expression of FUS3-GFP, FUS3-GFP(S>A) and FUS3-GFP(S>D) variants in the cotyledon, shoot apical meristem region (SAM), hypocotyl and root apical meristem region (RAM) of Arabidopsis 5-days-old seedlings grown on MS plates at control temperature. B) AKIN10-GFP was detected in all organs imaged. Similar results were obtained in 10-days-old seedlings. Plants were grown under long days at 21/18°C. Scale bars: 20  $\mu$ m.

A)

FUS3-GFP

FUS3<sup>S>A</sup>-GFP (3)FUS3<sup>S>D</sup>-GFP (11)

Cotyledon

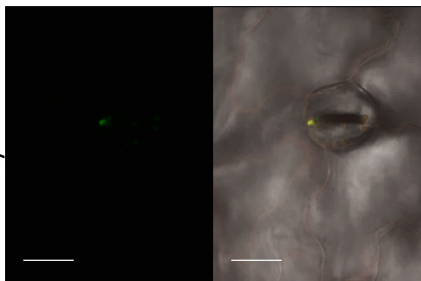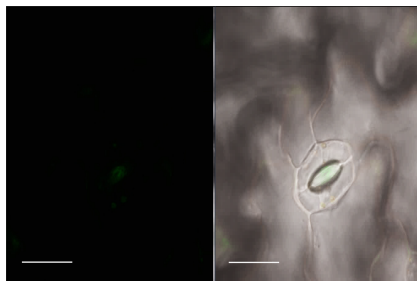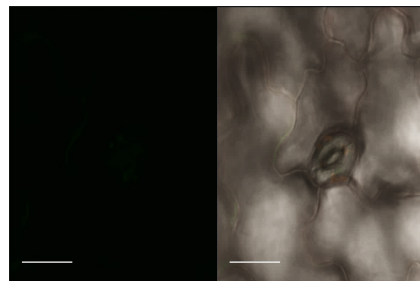

SAM

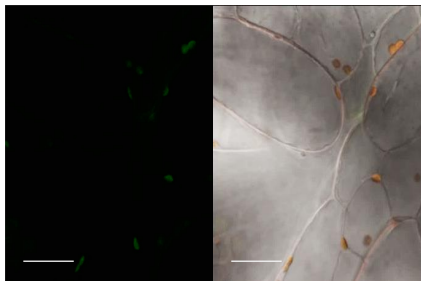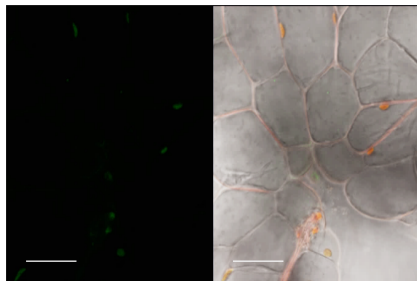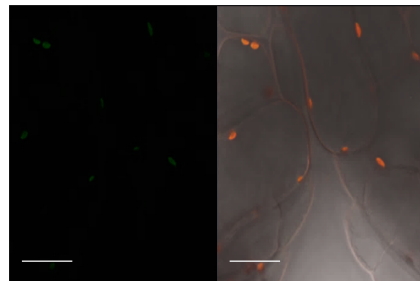

Hypocotyl

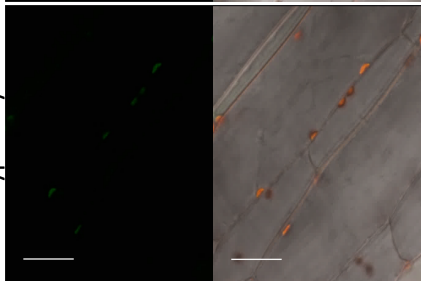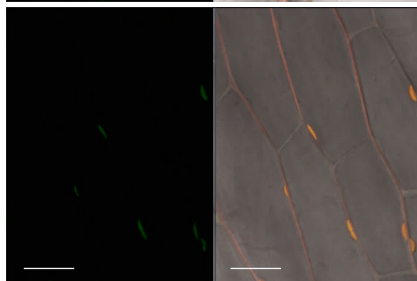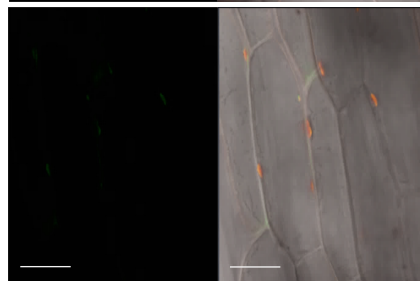

RAM

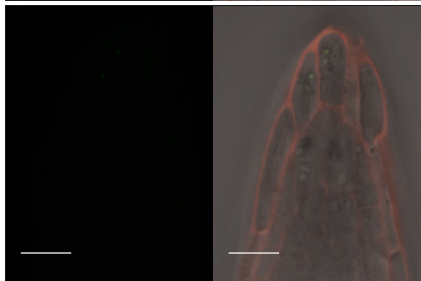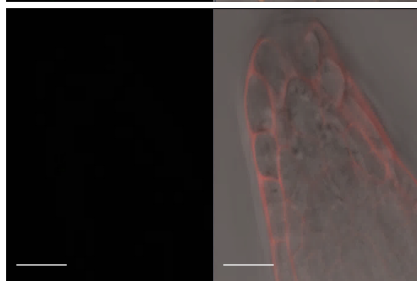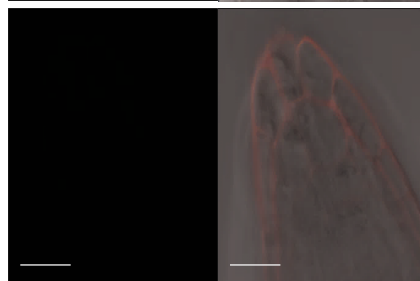

B)

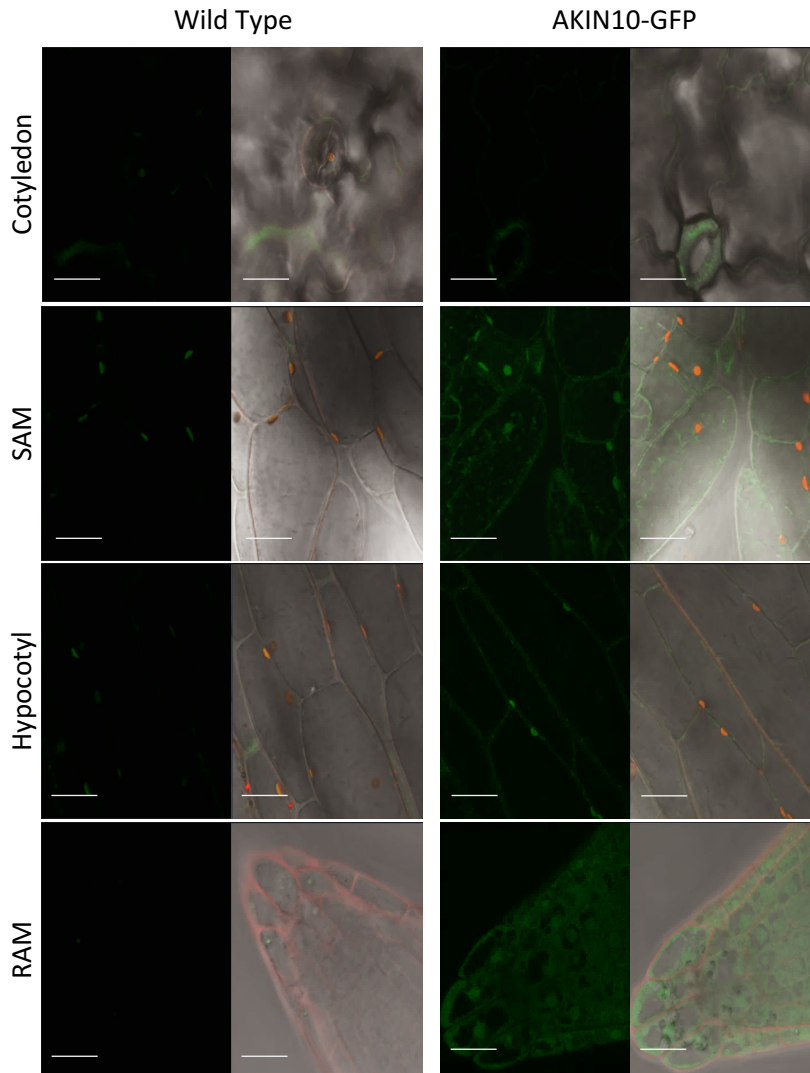

**Supplemental Fig. S4.** FUS3-GFP and its phospho-variants are undetectable during early vegetative development under elevated temperature

Confocal images showing lack of expression of FUS3-GFP, FUS3-GFP(S>A) and FUS3-GFP(S>D) variants in the cotyledon, shoot apical meristem (SAM), hypocotyl and root apical meristem (RAM) of Arabidopsis 5-days-old seedlings grown on MS plates at elevated temperature. AKIN10-GFP was detected in all organs imaged.

Similar results were obtained in 10-days-old seedlings. Plants were grown under long days at 27/24°C. Scale bars: 20  $\mu$ m.
